# Supplementary material for: Financial Benefits of Renal Dose-Adjusted Dipeptidyl Peptidase-4 Inhibitors for Patients with Type 2 Diabetes and Chronic Kidney Disease
Source: PubMed Central journal article supplement — Endocrinol Metab (Seoul). 2024 Aug 1;39(4):622–31. doi: 10.3803/EnM.2024.1965 (PMC11375300; doi:10.3803/enm.2024.1965), 2024-08-01
Supplement: enm-2024-1965-Supplemental-Fig-S1.pdf [file enm-2024-1965-Supplemental-Fig-S1.pdf]

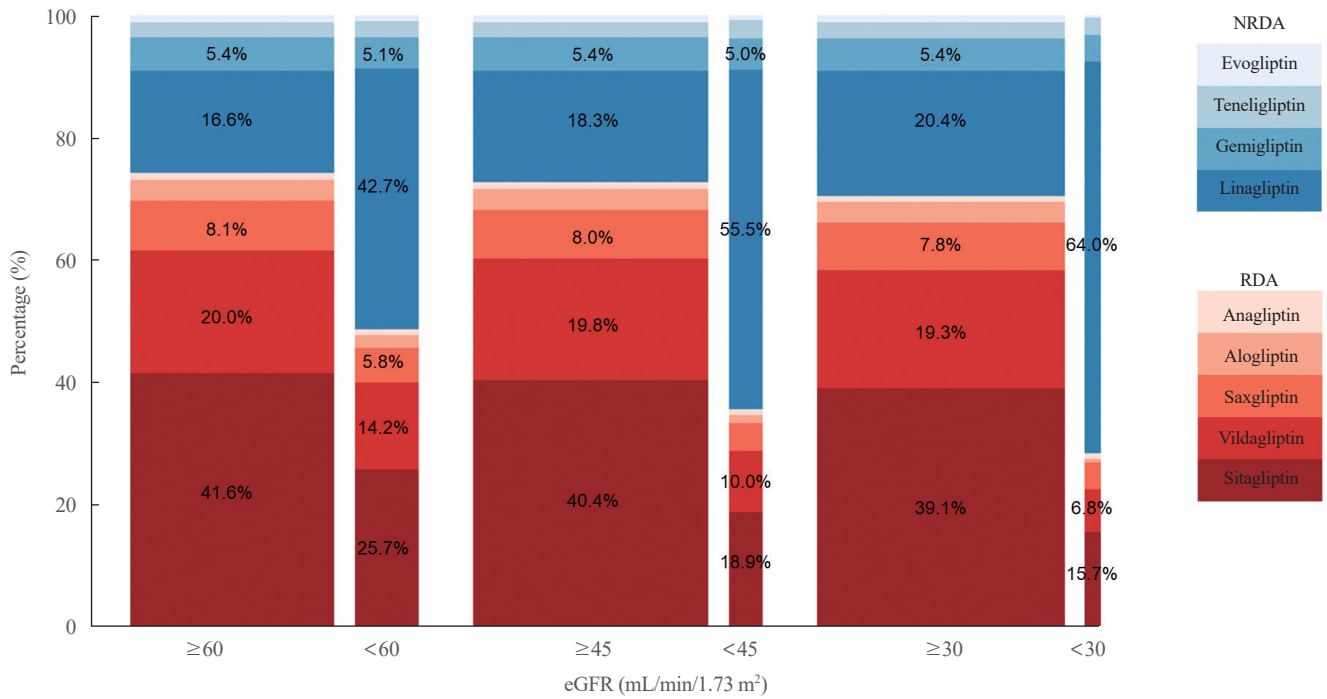

**Supplemental Fig. S1.** Prescription patterns of renal dose-adjusted (RDA) and non-renal dose-adjusted (NRDA) dipeptidyl peptidase-4 (DPP4) inhibitors according to kidney function. Each bar stacked to represent prescription rates for specific DPP4 inhibitors according to the estimated glomerular filtration rate (eGFR) cutoff values of 60 (left), 45 (middle), and 30 mL/min/1.73 m<sup>2</sup> (right). RDA DPP4 inhibitors are colored in reds and NRDA DPP4 inhibitors in blues. The widths of the columns are proportional to the number of patients in each eGFR group.
