# Supplementary material for: Financial Benefits of Renal Dose-Adjusted Dipeptidyl Peptidase-4 Inhibitors for Patients with Type 2 Diabetes and Chronic Kidney Disease
Source: PubMed Central journal article supplement — Endocrinol Metab (Seoul). 2024 Aug 1;39(4):622–31. doi: 10.3803/EnM.2024.1965 (PMC11375300; doi:10.3803/enm.2024.1965), 2024-08-01
Supplement: enm-2024-1965-Supplemental-Fig-S2.pdf [file enm-2024-1965-Supplemental-Fig-S2.pdf]

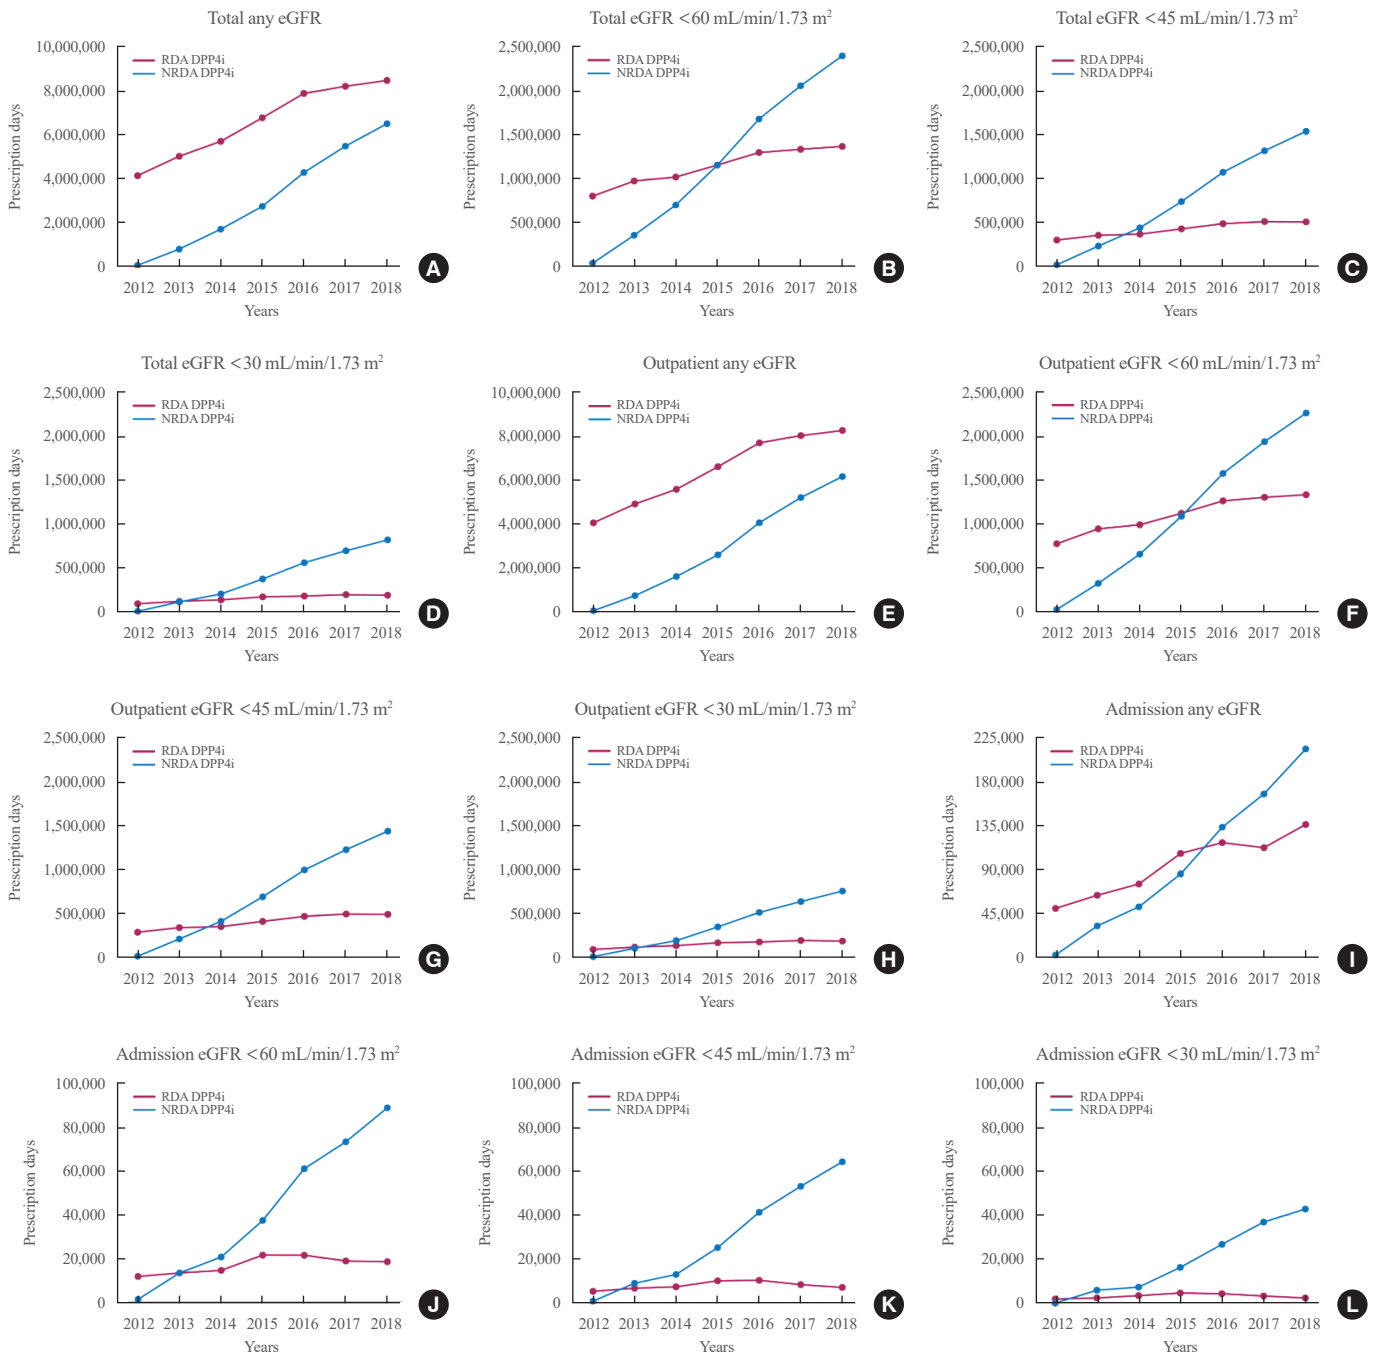

**Supplemental Fig. S2.** Prescription patterns of renal dose-adjusted (RDA) and non-renal dose-adjusted (NRDA) dipeptidyl peptidase-4 inhibitors (DPP4is) from 2012 to 2018. Prescription patterns of RDA and NRDA DPP4is from 2012 to 2018 in (A, B, C, D) patients with any estimated glomerular filtration rate (eGFR), (E, F, G, H) patients who were prescribed with DPP4is in outpatient clinics, and (I, J, K, L) patients who were prescribed with DPP4is during hospitalization.
