# Supplementary material for: Financial Benefits of Renal Dose-Adjusted Dipeptidyl Peptidase-4 Inhibitors for Patients with Type 2 Diabetes and Chronic Kidney Disease
Source: PubMed Central journal article supplement — Endocrinol Metab (Seoul). 2024 Aug 1;39(4):622–31. doi: 10.3803/EnM.2024.1965 (PMC11375300; doi:10.3803/enm.2024.1965), 2024-08-01
Supplement: enm-2024-1965-Supplemental-Table-S1.pdf [file enm-2024-1965-Supplemental-Table-S1.pdf]

**Supplemental Table S1.** Price of DPP4 Inhibitors in Korea (Unit: ₩)

| Class | DPP4 inhibitor | 2012 | 2013 | 2014 | 2015 | 2016 | 2017 | 2018 |
|-------|----------------|------|------|------|------|------|------|------|
| RDA   | Sitagliptin    | 924  | 924  | 924  | 910  | 910  | 910  | 910  |
|       | Vildagliptin   | 906  | 906  | 906  | 896  | 896  | 896  | 896  |
|       | Saxagliptin    | 850  | 850  | 827  | 827  | 827  | 827  | 827  |
|       | Alogliptin     |      |      | 777  | 777  | 759  | 759  | 759  |
|       | Anagliptin     |      |      |      | 738  | 738  | 738  | 738  |
| NRDA  | Linagliptin    | 831  | 831  | 763  | 752  | 752  | 752  | 752  |
|       | Gemigliptin    | 815  | 815  | 815  | 815  | 800  | 800  | 772  |
|       | Teneligliptin  |      |      |      | 739  | 739  | 739  | 739  |
|       | Evogliptin     |      |      |      |      | 737  | 737  | 737  |

DPP4, dipeptidyl peptidase-4; RDA, renal dose-adjusted; NRDA, non-renal dose-adjusted.
