# Supplementary material for: Financial Benefits of Renal Dose-Adjusted Dipeptidyl Peptidase-4 Inhibitors for Patients with Type 2 Diabetes and Chronic Kidney Disease
Source: PubMed Central journal article supplement — Endocrinol Metab (Seoul). 2024 Aug 1;39(4):622–31. doi: 10.3803/EnM.2024.1965 (PMC11375300; doi:10.3803/enm.2024.1965), 2024-08-01
Supplement: enm-2024-1965-Supplemental-Table-S2.pdf [file enm-2024-1965-Supplemental-Table-S2.pdf]

**Supplemental Table S2.** Average KRW to USD Annual Exchange Rate per Year

|                     | 2012    | 2013    | 2014    | 2015    | 2016    | 2017    | 2018    |
|---------------------|---------|---------|---------|---------|---------|---------|---------|
| Exchange rate, ₩/\$ | 1,070.6 | 1,055.4 | 1,099.3 | 1,172.5 | 1,207.7 | 1,070.5 | 1,115.7 |

KRW, South Korean won; USD, US dollar.
