# Supplementary material for: Financial Benefits of Renal Dose-Adjusted Dipeptidyl Peptidase-4 Inhibitors for Patients with Type 2 Diabetes and Chronic Kidney Disease
Source: PubMed Central journal article supplement — Endocrinol Metab (Seoul). 2024 Aug 1;39(4):622–31. doi: 10.3803/EnM.2024.1965 (PMC11375300; doi:10.3803/enm.2024.1965), 2024-08-01
Supplement: enm-2024-1965-Supplemental-Table-S3.pdf [file enm-2024-1965-Supplemental-Table-S3.pdf]

**Supplemental Table S3.** Recommended Dosage Adjustments of RDA DPP4 Inhibitors for Patients with Impaired Kidney Function

| Class | DPP4 inhibitor | Urinary excretion | Standard dosing | Recommended dosage in CKD                                                                                   |
|-------|----------------|-------------------|-----------------|-------------------------------------------------------------------------------------------------------------|
| RDA   | Sitagliptin    | 79%               | 100 mg qd       | 30 ≤ eGFR < 50 mL/min/1.73 m <sup>2</sup> : 50 mg qd<br>eGFR < 30 mL/min/1.73 m <sup>2</sup> : 25 mg qd     |
|       | Vildagliptin   | 85%               | 50 mg bid       | 30 ≤ eGFR < 50 mL/min/1.73 m <sup>2</sup> : 50 mg qd<br>eGFR < 30 mL/min/1.73 m <sup>2</sup> : 50 mg qd     |
|       | Saxagliptin    | 75%               | 5 mg qd         | 30 ≤ eGFR < 50 mL/min/1.73 m <sup>2</sup> : 2.5 mg qd<br>eGFR < 30 mL/min/1.73 m <sup>2</sup> : 2.5 mg qd   |
|       | Alogliptin     | 76%               | 25 mg qd        | 30 ≤ eGFR < 60 mL/min/1.73 m <sup>2</sup> : 12.5 mg qd<br>eGFR < 30 mL/min/1.73 m <sup>2</sup> : 6.25 mg qd |
|       | Anagliptin     | 76%               | 25 mg qd        | 30 ≤ eGFR < 60 mL/min/1.73 m <sup>2</sup> : 12.5 mg qd<br>eGFR < 30 mL/min/1.73 m <sup>2</sup> : 6.25 mg qd |

RDA, renal dose-adjusted; DPP4, dipeptidyl peptidase-4; CKD, chronic kidney disease; qd, once daily; eGFR, estimated glomerular filtration rate; bid, twice daily.
