# Supplementary material for: Financial Benefits of Renal Dose-Adjusted Dipeptidyl Peptidase-4 Inhibitors for Patients with Type 2 Diabetes and Chronic Kidney Disease
Source: PubMed Central journal article supplement — Endocrinol Metab (Seoul). 2024 Aug 1;39(4):622–31. doi: 10.3803/EnM.2024.1965 (PMC11375300; doi:10.3803/enm.2024.1965), 2024-08-01
Supplement: enm-2024-1965-Supplemental-Table-S5.pdf [file enm-2024-1965-Supplemental-Table-S5.pdf]

**Supplemental Table S5.** Baseline Characteristics of Patients according to eGFR  $\geq 30$  mL/min/1.73 m<sup>2</sup>

|                                           | Hospital | eGFR (all range)  | eGFR $\geq 30$ mL/min/1.73 m <sup>2</sup> | eGFR $< 30$ mL/min/1.73 m <sup>2</sup> |
|-------------------------------------------|----------|-------------------|-------------------------------------------|----------------------------------------|
| Prescription, <i>n</i>                    | Total    | 67,964,996        | 64,052,260                                | 3,912,736                              |
|                                           | A        | 22,511,187        | 21,154,342                                | 1,356,845                              |
|                                           | B        | 17,655,782        | 16,613,257                                | 1,042,525                              |
|                                           | C        | 11,094,455        | 10,542,390                                | 552,065                                |
|                                           | D        | 10,850,119        | 10,140,053                                | 710,066                                |
|                                           | E        | 5,853,453         | 5,602,218                                 | 251,235                                |
| Age, yr                                   | Total    | 64.8 $\pm$ 11.8   | 64.6 $\pm$ 11.7                           | 68.4 $\pm$ 12.3                        |
|                                           | A        | 65.5 $\pm$ 11.3   | 65.5 $\pm$ 11.1                           | 66.0 $\pm$ 13.4                        |
|                                           | B        | 65.1 $\pm$ 11.9   | 64.8 $\pm$ 11.9                           | 70.5 $\pm$ 10.9                        |
|                                           | C        | 62.2 $\pm$ 12.1   | 62.0 $\pm$ 12.0                           | 66.9 $\pm$ 12.1                        |
|                                           | D        | 66.3 $\pm$ 11.5   | 66.0 $\pm$ 11.5                           | 70.0 $\pm$ 11.2                        |
|                                           | E        | 63.7 $\pm$ 12.1   | 63.4 $\pm$ 11.9                           | 71.6 $\pm$ 12.1                        |
| Male sex                                  | Total    | 38,755,334 (57.0) | 36,629,077 (57.2)                         | 2,126,257 (54.3)                       |
|                                           | A        | 12,695,313 (56.4) | 11,992,294 (56.7)                         | 703,019 (51.8)                         |
|                                           | B        | 10,299,374 (58.3) | 9,675,776 (58.2)                          | 623,598 (59.8)                         |
|                                           | C        | 6,618,576 (59.7)  | 6,328,959 (60.0)                          | 289,617 (52.5)                         |
|                                           | D        | 5,913,047 (54.5)  | 5,516,410 (54.4)                          | 396,637 (55.9)                         |
|                                           | E        | 3,229,024 (55.2)  | 3,115,638 (55.6)                          | 113,386 (45.1)                         |
| eGFR, CKD-EPI, mL/min/1.73 m <sup>2</sup> | Total    | 75.3 $\pm$ 24.5   | 78.9 $\pm$ 20.1                           | 15.8 $\pm$ 8.9                         |
|                                           | A        | 75.2 $\pm$ 24.5   | 79.2 $\pm$ 19.4                           | 13.8 $\pm$ 9.1                         |
|                                           | B        | 78.5 $\pm$ 25.5   | 82.5 $\pm$ 20.4                           | 15.3 $\pm$ 8.8                         |
|                                           | C        | 75.2 $\pm$ 24.0   | 78.1 $\pm$ 20.5                           | 18.1 $\pm$ 8.2                         |
|                                           | D        | 71.6 $\pm$ 24.3   | 75.3 $\pm$ 20.2                           | 17.4 $\pm$ 8.5                         |
|                                           | E        | 72.8 $\pm$ 21.7   | 75.2 $\pm$ 18.9                           | 19.3 $\pm$ 8.1                         |

Values are expressed as mean $\pm$ standard deviation or number (%). The A, B, C, D, and E hospitals are Ajou University Hospital, Ewha Womans University Mokdong Hospital, Korea University Anam Hospital, Seoul National University Hospital, and Seoul National University Bundang Hospital in arbitrary order.

eGFR, estimated glomerular filtration rate; CKD-EPI, Chronic Kidney Disease Epidemiology Collaboration.
