# Supplementary material for: Financial Benefits of Renal Dose-Adjusted Dipeptidyl Peptidase-4 Inhibitors for Patients with Type 2 Diabetes and Chronic Kidney Disease
Source: PubMed Central journal article supplement — Endocrinol Metab (Seoul). 2024 Aug 1;39(4):622–31. doi: 10.3803/EnM.2024.1965 (PMC11375300; doi:10.3803/enm.2024.1965), 2024-08-01
Supplement: enm-2024-1965-Supplemental-Table-S6.pdf [file enm-2024-1965-Supplemental-Table-S6.pdf]

**Supplemental Table S6.** Prescription Patterns of DPP4 Inhibitors

| Variable                            | All        | RDA               | NRDA              |
|-------------------------------------|------------|-------------------|-------------------|
| All eGFR                            | 67,964,996 | 46,312,729 (68.1) | 21,652,267 (35.9) |
| Outpatient                          | 65,844,493 | 45,298,109 (68.8) | 20,546,384 (31.2) |
| Inpatient                           | 1,234,521  | 689,701 (50.9)    | 544,820 (58.1)    |
| eGFR ≥60 mL/min/1.73 m <sup>2</sup> | 51,655,751 | 38,376,634 (74.3) | 13,279,117 (25.7) |
| Outpatient                          | 50,227,915 | 37,558,487 (74.8) | 12,669,428 (25.2) |
| Inpatient                           | 938,272    | 544,820 (58.1)    | 393,452 (41.9)    |
| eGFR <60 mL/min/1.73 m <sup>2</sup> | 16,309,245 | 7,936,095 (48.7)  | 8,373,150 (51.3)  |
| Outpatient                          | 15,616,578 | 7,739,622 (49.6)  | 7,876,956 (50.4)  |
| Inpatient                           | 416,601    | 120,352 (28.9)    | 296,249 (71.1)    |
| eGFR <45 mL/min/1.73 m <sup>2</sup> | 8,378,587  | 2,987,841 (35.7)  | 5,390,746 (64.3)  |
| Outpatient                          | 7,932,833  | 2,894,755 (36.5)  | 5,038,078 (63.5)  |
| Inpatient                           | 261,419    | 54,941 (21.0)     | 206,478 (79.0)    |
| eGFR <30 mL/min/1.73 m <sup>2</sup> | 3,912,736  | 1,112,740 (28.4)  | 2,799,996 (71.6)  |
| Outpatient                          | 3,631,651  | 1,070,382 (29.5)  | 2,561,269 (70.5)  |
| Inpatient                           | 163,031    | 24,954 (15.3)     | 138,077 (84.7)    |

Values are expressed as number (%).

DPP4, dipeptidyl peptidase-4; RDA, renal dose-adjusted; NRDA, non-renal dose-adjusted; eGFR, estimated glomerular filtration rate.
