# Supplementary material for: Financial Benefits of Renal Dose-Adjusted Dipeptidyl Peptidase-4 Inhibitors for Patients with Type 2 Diabetes and Chronic Kidney Disease
Source: PubMed Central journal article supplement — Endocrinol Metab (Seoul). 2024 Aug 1;39(4):622–31. doi: 10.3803/EnM.2024.1965 (PMC11375300; doi:10.3803/enm.2024.1965), 2024-08-01
Supplement: enm-2024-1965-Supplemental-Table-S7.pdf [file enm-2024-1965-Supplemental-Table-S7.pdf]

**Supplemental Table S7.** Economic Benefit of Prescribing RDA DPP4 Inhibitors in Patients with Impaired Kidney Function

| Variable                                    | Medical expenditure (2012–2018) |              |              | Cost reduction |            |
|---------------------------------------------|---------------------------------|--------------|--------------|----------------|------------|
|                                             | Cost in CKD, \$                 | Model 1, \$  | Model 2, \$  | Model 1, %     | Model 2, % |
| CKD-EPI eGFR <60 mL/min/1.73 m <sup>2</sup> |                                 |              |              |                |            |
| Total                                       | 9,941,163.6                     | -759,186.0   | -1,529,494.9 | -7.6           | -15.4      |
| Outpatient                                  | 9,507,536.2                     | -713,071.4   | -1,428,434.6 | -7.5           | -15.0      |
| Inpatient                                   | 261,672.8                       | -26,727.9    | -65,814.1    | -10.2          | -25.1      |
| CKD-EPI eGFR <45 mL/min/1.73 m <sup>2</sup> |                                 |              |              |                |            |
| Total                                       | 4,800,696.8                     | -1,081,435.3 | -1,885,563.1 | -22.5          | -39.3      |
| Outpatient                                  | 4,525,634.7                     | -1,019,711.9 | -1,764,259.7 | -22.5          | -39.0      |
| Inpatient                                   | 161,269.1                       | -32,376.6    | -73,264.4    | -20.1          | -45.4      |
| CKD-EPI eGFR <30 mL/min/1.73 m <sup>2</sup> |                                 |              |              |                |            |
| Total                                       | 2,267,541.3                     | -689,857.2   | -1,160,832.6 | -30.4          | -51.2      |
| Outpatient                                  | 2,089,372.9                     | -641,276.8   | -1,071,897.7 | -30.7          | -51.3      |
| Inpatient                                   | 102,428.5                       | -24,948.5    | -54,251.2    | -24.3          | -52.9      |

RDA, renal dose-adjusted; DPP4, dipeptidyl peptidase-4; CKD, chronic kidney disease; CKD-EPI, Chronic Kidney Disease Epidemiology Collaboration; eGFR, estimated glomerular filtration rate.
