# Supplementary material for: Financial Benefits of Renal Dose-Adjusted Dipeptidyl Peptidase-4 Inhibitors for Patients with Type 2 Diabetes and Chronic Kidney Disease
Source: PubMed Central journal article supplement — Endocrinol Metab (Seoul). 2024 Aug 1;39(4):622–31. doi: 10.3803/EnM.2024.1965 (PMC11375300; doi:10.3803/enm.2024.1965), 2024-08-01
Supplement: enm-2024-1965-Supplemental-Table-S8.pdf [file enm-2024-1965-Supplemental-Table-S8.pdf]

**Supplemental Table S8.** Annual Economic Benefit per Patient from RDA DPP4 Inhibitor Prescription for Impaired Kidney Function (2012 to 2018)

| Variable                                    | Medical expenditure (2012–2018) |             |             | Cost reduction |            |
|---------------------------------------------|---------------------------------|-------------|-------------|----------------|------------|
|                                             | Cost in CKD, \$                 | Model 1, \$ | Model 2, \$ | Model 1, %     | Model 2, % |
| CKD-EPI eGFR <60 mL/min/1.73 m <sup>2</sup> |                                 |             |             |                |            |
| Total                                       | 222.7                           | -17.0       | -34.2       | -7.6           | -15.4      |
| Outpatient                                  | 222.4                           | -16.6       | -33.3       | -7.5           | -15.0      |
| Inpatient                                   | 229.7                           | -23.2       | -57.4       | -10.2          | -25.1      |
| CKD-EPI eGFR <45 mL/min/1.73 m <sup>2</sup> |                                 |             |             |                |            |
| Total                                       | 209.8                           | -47.2       | -82.3       | -22.5          | -39.3      |
| Outpatient                                  | 208.9                           | -47.0       | -81.3       | -22.5          | -39.0      |
| Inpatient                                   | 226.2                           | -44.9       | -102.1      | -20.1          | -45.4      |
| CKD-EPI eGFR <30 mL/min/1.73 m <sup>2</sup> |                                 |             |             |                |            |
| Total                                       | 212.9                           | -64.3       | -108.2      | -30.4          | -51.2      |
| Outpatient                                  | 211.2                           | -64.5       | -107.7      | -30.7          | -51.3      |
| Inpatient                                   | 230.9                           | -55.2       | -120.7      | -24.3          | -52.9      |

RDA, renal dose-adjusted; DPP4, dipeptidyl peptidase-4; CKD, chronic kidney disease; CKD-EPI, Chronic Kidney Disease Epidemiology Collaboration; eGFR, estimated glomerular filtration rate.
