# Supplementary material for: Financial Benefits of Renal Dose-Adjusted Dipeptidyl Peptidase-4 Inhibitors for Patients with Type 2 Diabetes and Chronic Kidney Disease
Source: PubMed Central journal article supplement — Endocrinol Metab (Seoul). 2024 Aug 1;39(4):622–31. doi: 10.3803/EnM.2024.1965 (PMC11375300; doi:10.3803/enm.2024.1965), 2024-08-01
Supplement: enm-2024-1965-Supplemental-Table-S9.pdf [file enm-2024-1965-Supplemental-Table-S9.pdf]

**Supplemental Table S9.** Economic Benefit of Prescribing RDA DPP4 Inhibitors in Patients with Impaired Kidney Function per Year (2012 to 2018)

|                                                      | 2012             | 2013              | 2014               | 2015               | 2016               | 2017               | 2018               |
|------------------------------------------------------|------------------|-------------------|--------------------|--------------------|--------------------|--------------------|--------------------|
| <b>CKD-EPI eGFR &lt;60 mL/min/1.73 m<sup>2</sup></b> |                  |                   |                    |                    |                    |                    |                    |
| Current                                              | 509,889.3        | 850,109.4         | 1,046,988.9        | 1,307,819.0        | 1,654,095.7        | 2,142,199.2        | 2,290,413.7        |
| Model 1                                              | -4,404.5 (-0.9)  | -41,637.1 (-4.9)  | -53,183.5 (-5.1)   | -95,102.7 (-7.3)   | -130,370.8 (-7.9)  | -175,248.9 (-8.2)  | -188,948.8 (-8.2)  |
| Model 2                                              | -5,936.2 (-1.2)  | -70,981.7 (-8.3)  | -100,744.0 (-9.6)  | -177,907.5 (-13.6) | -270,351.1 (-16.3) | -395,496.9 (-18.5) | -443,065.1 (-19.3) |
| <b>CKD-EPI eGFR &lt;45 mL/min/1.73 m<sup>2</sup></b> |                  |                   |                    |                    |                    |                    |                    |
| Current                                              | 135,086.8        | 322,657.9         | 442,599.4          | 619,021.2          | 828,886.7          | 1,118,976.3        | 1,220,068.4        |
| Model 1                                              | -7,883.2 (-5.8)  | -65,594.8 (-20.3) | -91,978.6 (-20.8)  | -143,006.1 (-23.1) | -182,690.6 (-22.0) | -237,424.2 (-21.2) | -256,716.3 (-21.0) |
| Model 2                                              | -9,428.1 (-7.0)  | -94,362.8 (-29.2) | -146,974.0 (-33.2) | -234,824.2 (-37.9) | -331,860.0 (-40.0) | -466,122.3 (-41.7) | -519,758.6 (-42.6) |
| <b>CKD-EPI eGFR &lt;30 mL/min/1.73 m<sup>2</sup></b> |                  |                   |                    |                    |                    |                    |                    |
| Current                                              | 509,889.3        | 850,109.4         | 1,046,988.9        | 1,307,819.0        | 1,654,095.7        | 2,142,199.2        | 2,290,413.7        |
| Model 1                                              | -5,048.5 (-13.7) | -37,944.0 (-29.5) | -50,781.0 (-27.6)  | -86,719.7 (-30.0)  | -114,587.0 (-28.7) | -153,109.1 (-27.7) | -172,000.8 (-28.1) |
| Model 2                                              | -5,776.8 (-15.7) | -53,444.8 (-41.5) | -80,461.0 (-43.7)  | -140,635.3 (-48.6) | -203,515.5 (-51.0) | -293,740.8 (-53.1) | -336,532.4 (-55.0) |

Values are expressed in US dollars (\$) indicating total annual cost savings, with percentages (%) in parentheses representing the relative reduction in costs.

RDA, renal dose-adjusted; DPP4, dipeptidyl peptidase-4; CKD-EPI, Chronic Kidney Disease Epidemiology Collaboration; eGFR, estimated glomerular filtration rate.
